# Supplementary material
Source: HighWire-hosted journal article supplement (https://bibliotheek.ehb.be/content/31/1/73)
Supplement: inline-supplementary-material-5 [file inline-supplementary-material-5.pdf]

Supplementary Table 2. Distribution of planning areas<sup>1</sup> in Rio de Janeiro city by socioeconomic variables<sup>2</sup> and illicit cigarette consumption. *PDG* survey, 2018.

| Planning Areas/Rio de Janeiro city | % of illiterate individuals between 10-14 years-old <sup>3</sup> | % of households with household income per capita less or equal 1 minimum wage <sup>4</sup> | Illicit cigarette consumption <sup>3,4</sup> |             |
|------------------------------------|------------------------------------------------------------------|--------------------------------------------------------------------------------------------|----------------------------------------------|-------------|
|                                    |                                                                  |                                                                                            | %                                            | CI 95%      |
| <b>Rio de Janeiro city (All)</b>   | 2.0                                                              | 42.2                                                                                       | 26.8                                         | (25.1-28.6) |
| “22 – Tijuca”                      | 1.4                                                              | 18.6                                                                                       | 3.4                                          | (1.3-8.6)   |
| “21 – Zona Sul”                    | 1.0                                                              | 12.4                                                                                       | 8.2                                          | (5.1-12.9)  |
| “42 – Barra da Tijuca”             | 1.5                                                              | 23.2                                                                                       | 10.1                                         | (6.1-16.4)  |
| “34 – Inhaúma”                     | 1.5                                                              | 44.5                                                                                       | 11.1                                         | (6.4-18.6)  |
| “32 – Méier”                       | 1.6                                                              | 33.1                                                                                       | 19.3                                         | (14.8-24.7) |
| “37 – Ilha do Governador”          | 1.5                                                              | 35.4                                                                                       | 22.0                                         | (15.7-29.8) |
| “10 – Centro”                      | 2.2                                                              | 44.1                                                                                       | 22.3                                         | (17.0-28.7) |
| “41 – Jararepaguá”                 | 2.2                                                              | 37.9                                                                                       | 23.3                                         | (17.7-30.0) |
| “33 – Madureira”                   | 1.5                                                              | 42.4                                                                                       | 28.3                                         | (24.5-32.4) |
| “52 – Campo Grande”                | 1.8                                                              | 54.1                                                                                       | 30.4                                         | (23.2-38.6) |
| “35 – Penha”                       | 2.0                                                              | 52.8                                                                                       | 30.8                                         | (23.4-39.2) |
| “53 – Santa Cruz”                  | 2.9                                                              | 67.2                                                                                       | 35.9                                         | (28.1-44.4) |
| “31 – Ramos”                       | 2.2                                                              | 46.0                                                                                       | 37.4                                         | (28.1-47.7) |
| “51 – Bangu”                       | 1.8                                                              | 54.8                                                                                       | 42.8                                         | (36.6-49.2) |
| “36 – Pavuna”                      | 2.4                                                              | 59.1                                                                                       | 46.3                                         | (39.0-53.7) |

<sup>1</sup> Each of the 15 planning areas of the city of Rio de Janeiro are comprised of geographically-bounded neighborhoods

<sup>2</sup> According to the Brazilian Geography and Statistics Institute (2010)

<sup>3</sup> Pearson correlation coefficient: 0.70

<sup>4</sup> Pearson correlation coefficient: 0.85
